# Supplementary material for: Activation of X–H and X–D bonds (X = O, N, C) by alkaline-earth metal monoxide cations: experiment and theory
Source: Royal Society of Chemistry journal article supplement (doi:10.1039/b903413g), 2009-01-01
Supplement: b903413g.pdf [file b903413g.pdf]

## Supplementary Information

### Activation of X-H and X-D Bonds (X = O, N, C) by alkaline-earth metal monoxide cations: experiment and theory

Andrea Božović and Diethard K. Bohme\*

*Department of Chemistry, Centre for Research in Mass Spectrometry and Centre for Research in Earth and Space Science, York University, Toronto, Ontario, Canada, M3J 1P3.*

#### 1. Ammonia Oxide, H<sub>3</sub>NO

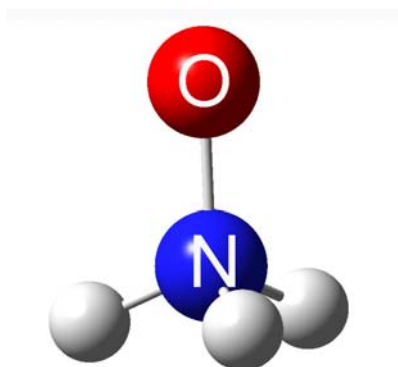

Figure 1. Structure of ammonia oxide optimized at B3LYP/6-311++G(2df,p) level of theory

Optimized geometry

|   |          |           |          |
|---|----------|-----------|----------|
| O | 1        |           |          |
| N | 0.537976 | 0.000015  | 0.000020 |
| H | 0.939029 | -0.471844 | 0.828172 |

|   |           |           |           |
|---|-----------|-----------|-----------|
| H | 0.938950  | 0.953173  | -0.005495 |
| H | 0.939158  | -0.481334 | -0.822727 |
| O | -0.822871 | -0.000013 | -0.000012 |

Thermochemistry

|                                              |             |
|----------------------------------------------|-------------|
| Sum of electronic and zero-point Energies=   | -131.694178 |
| Sum of electronic and thermal Energies=      | -131.691252 |
| Sum of electronic and thermal Enthalpies=    | -131.690308 |
| Sum of electronic and thermal Free Energies= | -131.716473 |

2. Reactions of  $\text{MO}^+$  (M = Ca, Sr, Ba) with  $\text{NH}_3$ .

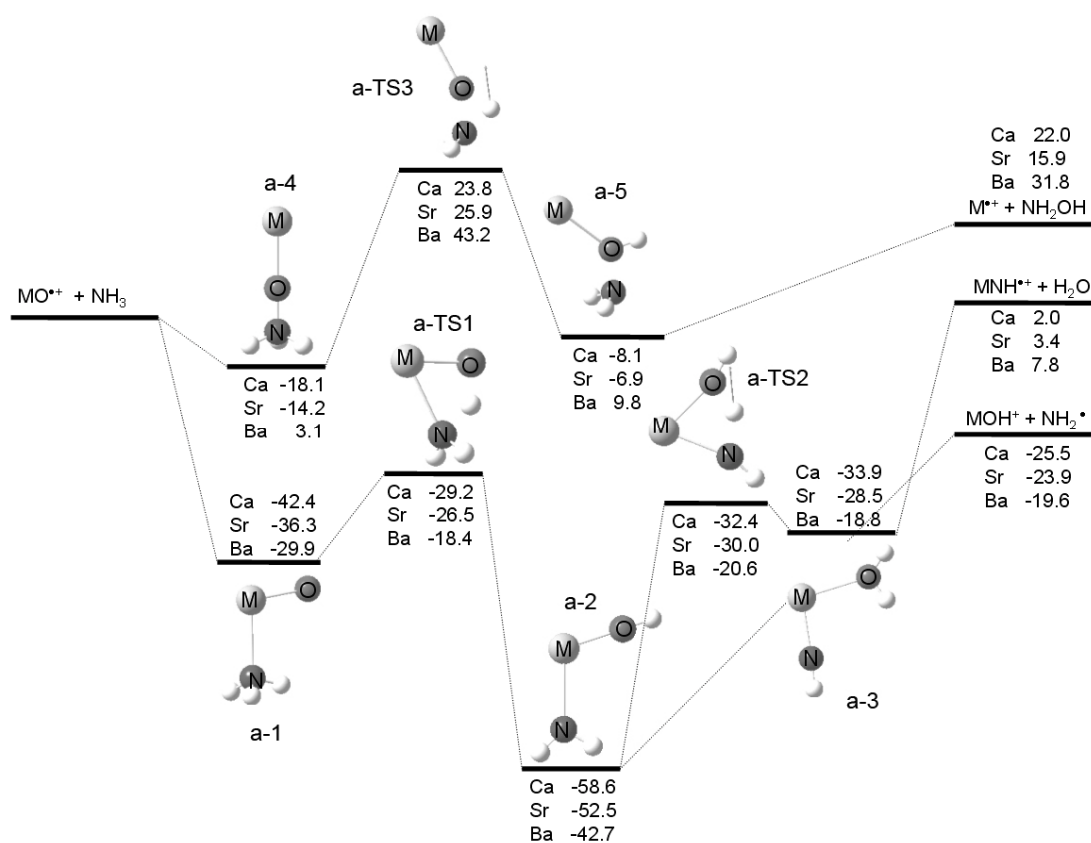

Figure 2. Enthalpy profile for the reactions of  $\text{MO}^+$  (M = Ca, Sr, Ba) with ammonia based on the relative enthalpies computed at the B3LYP/SDD/6-31G(d) level of theory.

Figure 2 illustrates the potential enthalpy surface for reaction pathways considered in the reaction of  $\text{MO}^{*+}$  and  $\text{NH}_3$ , where M is a heavy alkaline earth metal Ca, Sr or Ba. All species are calculated at the B3LYP/SDD/6-31G(d) level of theory. The geometries of the structures change as the size of the metal cation increases. The Cartesian coordinates of all optimized minima and maxima are listed below. The numbers shown on the surface represent the change in the enthalpy with respect to the reactants, and are indicated for all intermediates and transition structures for all three metals.

The Figure shows that the relative stabilities of the species on the surface decrease with increasing size of the metal. In addition, the calculations at this level of theory suggest that the only exothermic, and therefore the thermodynamically favoured channel, is the H-atom abstraction. This is consistent with the experimental observations.

Structures optimized at B3LYP/SDD/6-31G(d) level of theory

### Calcium

#### CaO<sup>+</sup>

|    |          |          |           |
|----|----------|----------|-----------|
| O  | 0.000000 | 0.000000 | -1.414236 |
| Ca | 0.000000 | 0.000000 | 0.565695  |

#### NH<sub>3</sub>

|   |           |           |           |
|---|-----------|-----------|-----------|
| N | 0.000000  | 0.000000  | 0.119357  |
| H | 0.000000  | 0.938797  | -0.278500 |
| H | -0.813022 | -0.469398 | -0.278500 |
| H | 0.813022  | -0.469398 | -0.278500 |

#### a-1-Ca

|   |           |           |           |
|---|-----------|-----------|-----------|
| N | -1.855817 | 0.338054  | -0.000156 |
| H | -2.560768 | -0.033924 | -0.642650 |

Supplementary Material (ESI) for *PCCP*  
This journal is © the Owner Societies 2009

|    |           |           |           |
|----|-----------|-----------|-----------|
| H  | -1.737528 | 1.320482  | -0.270184 |
| H  | -2.321068 | 0.372779  | 0.911708  |
| Ca | 0.400318  | -0.633409 | 0.000202  |
| O  | 1.450466  | 1.080309  | -0.000227 |

a-TS1-Ca

|    |           |           |           |
|----|-----------|-----------|-----------|
| N  | 1.429459  | -0.625432 | 0.000006  |
| H  | 2.024140  | -0.772023 | 0.821400  |
| H  | 1.272176  | 0.665590  | -0.000013 |
| H  | 2.024137  | -0.772047 | -0.821387 |
| Ca | -0.893985 | -0.282717 | 0.000006  |
| O  | 0.319130  | 1.363854  | -0.000020 |

a-2-Ca

|    |           |           |           |
|----|-----------|-----------|-----------|
| N  | -2.045440 | 0.453319  | -0.000002 |
| H  | -2.130888 | 1.479191  | 0.000026  |
| H  | 2.320739  | 1.372370  | 0.000016  |
| H  | -3.008226 | 0.091848  | -0.000018 |
| Ca | 0.212400  | -0.593008 | 0.000002  |
| O  | 1.611058  | 0.717939  | -0.000006 |

a-TS2-Ca

|    |           |           |           |
|----|-----------|-----------|-----------|
| N  | 0.673959  | 1.400028  | -0.000003 |
| H  | 1.815331  | -1.630466 | 0.000154  |
| H  | 1.121100  | 2.318475  | -0.000007 |
| Ca | -0.880698 | -0.128132 | -0.000049 |
| O  | 1.076184  | -1.003504 | 0.000097  |
| H  | 1.350347  | 0.102477  | 0.000078  |

a-3-Ca

|    |           |           |           |
|----|-----------|-----------|-----------|
| N  | -1.702931 | 0.791646  | 0.000077  |
| H  | 2.743104  | 0.212866  | 0.000180  |
| H  | -2.446872 | 1.491784  | 0.000080  |
| Ca | -0.232262 | -0.627437 | -0.000014 |
| O  | 1.807348  | 0.480832  | -0.000047 |
| H  | 1.810741  | 1.455912  | -0.000140 |

a-4-Ca

|    |           |           |           |
|----|-----------|-----------|-----------|
| N  | -2.078712 | 0.000110  | 0.000261  |
| H  | -2.447137 | 0.962086  | -0.058074 |
| H  | -2.446877 | -0.430044 | 0.862798  |
| H  | -2.447953 | -0.531492 | -0.803233 |
| O  | -0.709635 | -0.000266 | -0.000667 |
| Ca | 1.378502  | 0.000040  | 0.000101  |

a-TS3-Ca

Supplementary Material (ESI) for *PCCP*  
This journal is © the Owner Societies 2009

|    |           |           |           |
|----|-----------|-----------|-----------|
| N  | 2.223171  | -0.115699 | -0.002420 |
| O  | 0.754027  | 0.272968  | 0.001012  |
| H  | 1.715163  | 0.987464  | -0.064045 |
| H  | 2.398520  | -0.692722 | -0.825115 |
| H  | 2.429895  | -0.580112 | 0.881949  |
| Ca | -1.406899 | -0.054424 | 0.000803  |

a-5-Ca

|    |           |           |           |
|----|-----------|-----------|-----------|
| N  | -2.100298 | -0.276284 | -0.000008 |
| O  | -0.859376 | 0.505841  | -0.000037 |
| H  | -1.186207 | 1.424959  | 0.000064  |
| H  | -2.025645 | -0.868651 | 0.828408  |
| H  | -2.025491 | -0.868894 | -0.828239 |
| Ca | 1.340722  | -0.090008 | 0.000006  |

NH<sub>2</sub>OH

|   |           |           |           |
|---|-----------|-----------|-----------|
| N | 0.011456  | 0.709274  | 0.000000  |
| O | 0.011456  | -0.739187 | 0.000000  |
| H | 0.960972  | -0.936179 | 0.000000  |
| H | -0.566407 | 0.942378  | 0.810631  |
| H | -0.566407 | 0.942378  | -0.810631 |

CaOH<sup>+</sup>

|    |          |          |           |
|----|----------|----------|-----------|
| Ca | 0.000000 | 0.000000 | 0.619784  |
| O  | 0.000000 | 0.000000 | -1.269871 |
| H  | 0.000000 | 0.000000 | -2.236715 |

CaNH<sup>+</sup>

|    |           |           |          |
|----|-----------|-----------|----------|
| Ca | 0.000042  | -0.612935 | 0.000000 |
| N  | 0.000042  | 1.404602  | 0.000000 |
| H  | -0.001121 | 2.426485  | 0.000000 |

H<sub>2</sub>O

|   |           |           |          |
|---|-----------|-----------|----------|
| O | 0.000000  | 0.119720  | 0.000000 |
| H | 0.761563  | -0.478878 | 0.000000 |
| H | -0.761563 | -0.478880 | 0.000000 |

NH<sub>2</sub><sup>-</sup>

|   |          |           |           |
|---|----------|-----------|-----------|
| N | 0.000000 | 0.000000  | 0.144489  |
| H | 0.000000 | 0.804400  | -0.505711 |
| H | 0.000000 | -0.804400 | -0.505711 |

**Strontium**

SrO<sup>+</sup>

|   |          |          |           |
|---|----------|----------|-----------|
| O | 0.000000 | 0.000000 | -1.657662 |
|---|----------|----------|-----------|

Supplementary Material (ESI) for *PCCP*  
This journal is © the Owner Societies 2009

|    |          |          |          |
|----|----------|----------|----------|
| Sr | 0.000000 | 0.000000 | 0.348982 |
|----|----------|----------|----------|

a-1-Sr

|    |           |           |           |
|----|-----------|-----------|-----------|
| N  | -2.180406 | 0.348618  | -0.000385 |
| H  | -2.933758 | -0.300628 | -0.239557 |
| H  | -2.271856 | 1.126234  | -0.660783 |
| H  | -2.451121 | 0.751778  | 0.901134  |
| Sr | 0.342627  | -0.406189 | 0.000101  |
| O  | 1.237470  | 1.427183  | -0.000243 |

a-TS1-Sr

|    |           |           |           |
|----|-----------|-----------|-----------|
| N  | 1.722662  | -0.778308 | 0.000004  |
| H  | 2.294908  | -1.006902 | 0.818424  |
| H  | 1.757425  | 0.525319  | -0.000014 |
| H  | 2.294901  | -1.006925 | -0.818415 |
| Sr | -0.682432 | -0.106309 | 0.000004  |
| O  | 0.940821  | 1.372049  | -0.000022 |

a-2-Sr

|    |           |           |           |
|----|-----------|-----------|-----------|
| N  | -2.218629 | 0.570040  | -0.000363 |
| H  | -2.308375 | 1.583620  | -0.155974 |
| H  | 1.872569  | 2.056028  | 0.020308  |
| H  | -3.176281 | 0.230133  | 0.158209  |
| Sr | 0.223274  | -0.471295 | -0.002977 |
| O  | 1.332262  | 1.256145  | 0.011640  |

a-TS2-Sr

|    |           |           |           |
|----|-----------|-----------|-----------|
| N  | 1.233279  | 1.334507  | 0.000019  |
| H  | 2.058341  | -1.790817 | 0.000176  |
| H  | 1.826919  | 2.166746  | 0.000021  |
| Sr | -0.661427 | -0.018847 | -0.000036 |
| O  | 1.360578  | -1.118463 | 0.000119  |
| H  | 1.731389  | -0.053571 | 0.000100  |

a-3-Sr

|    |           |           |           |
|----|-----------|-----------|-----------|
| N  | 1.421056  | 1.358344  | 0.000649  |
| H  | -2.931584 | 0.304999  | 0.015173  |
| H  | 1.994868  | 2.204795  | 0.000921  |
| Sr | 0.237834  | -0.482087 | -0.000061 |
| O  | -2.002406 | 0.591901  | -0.001888 |
| H  | -2.029121 | 1.565885  | -0.003199 |

a-4-Sr

|   |          |           |           |
|---|----------|-----------|-----------|
| N | 2.630636 | -0.000006 | -0.000298 |
| H | 3.000774 | 0.900668  | -0.340583 |
| H | 3.000518 | -0.744885 | -0.610515 |

Supplementary Material (ESI) for *PCCP*  
This journal is © the Owner Societies 2009

|    |           |           |           |
|----|-----------|-----------|-----------|
| H  | 3.001599  | -0.155883 | 0.949506  |
| O  | 1.258676  | 0.000027  | 0.000721  |
| Sr | -0.986494 | -0.000002 | -0.000055 |

a-TS3-Sr

|    |           |           |           |
|----|-----------|-----------|-----------|
| N  | 2.795961  | -0.113052 | -0.001694 |
| O  | 1.320487  | 0.259573  | 0.000515  |
| H  | 2.287872  | 0.978878  | -0.051442 |
| H  | 2.982561  | -0.676869 | -0.830437 |
| H  | 3.006433  | -0.586142 | 0.876591  |
| Sr | -1.010855 | -0.026345 | 0.000343  |

a-5-Sr

|    |           |           |           |
|----|-----------|-----------|-----------|
| N  | -2.659381 | -0.287453 | -0.000459 |
| O  | -1.426903 | 0.504225  | 0.000022  |
| H  | -1.768756 | 1.417162  | -0.001762 |
| H  | -2.580699 | -0.877922 | 0.828666  |
| H  | -2.576769 | -0.883625 | -0.825057 |
| Sr | 0.972556  | -0.044138 | 0.000031  |

SrOH<sup>+</sup>

|    |          |          |           |
|----|----------|----------|-----------|
| Sr | 0.000000 | 0.000000 | 0.408511  |
| O  | 0.000000 | 0.000000 | -1.617440 |
| H  | 0.000000 | 0.000000 | -2.583884 |

SrNH<sup>+</sup>

|    |          |          |           |
|----|----------|----------|-----------|
| Sr | 0.000000 | 0.000000 | 0.397821  |
| N  | 0.000000 | 0.000000 | -1.761826 |
| H  | 0.000000 | 0.000000 | -2.784411 |

**Barium**

BaO<sup>+</sup>

|    |          |          |           |
|----|----------|----------|-----------|
| O  | 0.000000 | 0.000000 | -1.833249 |
| Ba | 0.000000 | 0.000000 | 0.261893  |

a-1-Ba

|    |           |           |           |
|----|-----------|-----------|-----------|
| N  | -2.451146 | 0.214975  | -0.000246 |
| H  | -3.130040 | -0.538472 | -0.130205 |
| H  | -2.659081 | 0.897013  | -0.734461 |
| H  | -2.731207 | 0.682875  | 0.865738  |
| Ba | 0.338338  | -0.298014 | 0.000028  |
| O  | 0.841424  | 1.767817  | -0.000116 |

a-TS1-Ba

|   |          |           |          |
|---|----------|-----------|----------|
| N | 2.024053 | -0.802925 | 0.000003 |
|---|----------|-----------|----------|

Supplementary Material (ESI) for *PCCP*  
This journal is © the Owner Societies 2009

|    |           |           |           |
|----|-----------|-----------|-----------|
| H  | 2.604020  | -1.017457 | 0.817730  |
| H  | 2.048262  | 0.492249  | -0.000015 |
| H  | 2.604013  | -1.017479 | -0.817724 |
| Ba | -0.561969 | -0.065549 | 0.000003  |
| O  | 1.255696  | 1.354235  | -0.000023 |

a-2-Ba

|    |           |           |           |
|----|-----------|-----------|-----------|
| N  | 2.501358  | 0.439755  | 0.000467  |
| H  | 2.716493  | 1.442667  | 0.088540  |
| H  | -1.355968 | 2.562741  | -0.009721 |
| H  | 3.415727  | -0.023822 | -0.087432 |
| Ba | -0.255605 | -0.363890 | 0.001014  |
| O  | -0.996487 | 1.664747  | -0.006433 |

a-TS2-Ba

|    |           |           |           |
|----|-----------|-----------|-----------|
| N  | 1.534186  | 1.327994  | 0.000023  |
| H  | 2.361647  | -1.783254 | 0.000181  |
| H  | 2.160121  | 2.138216  | 0.000025  |
| Ba | -0.543537 | -0.010153 | -0.000026 |
| O  | 1.646883  | -1.128067 | 0.000124  |
| H  | 2.001949  | -0.057840 | 0.000099  |

a-3-Ba

|    |           |           |           |
|----|-----------|-----------|-----------|
| N  | -0.855045 | 1.890352  | -0.006932 |
| H  | 3.161086  | -0.098076 | -0.103828 |
| H  | -1.137189 | 2.875681  | -0.018835 |
| Ba | -0.300207 | -0.353952 | 0.001025  |
| O  | 2.288698  | 0.318041  | -0.001560 |
| H  | 2.463404  | 1.266901  | 0.126288  |

a-4-Ba

|    |           |           |           |
|----|-----------|-----------|-----------|
| N  | -2.959117 | 0.000174  | 0.000260  |
| H  | -3.328053 | 0.957149  | -0.113843 |
| H  | -3.327996 | -0.379126 | 0.886256  |
| H  | -3.329021 | -0.577120 | -0.771010 |
| O  | -1.585699 | -0.000408 | -0.000622 |
| Ba | 0.774723  | 0.000020  | 0.000031  |

a-TS3-Ba

|    |           |           |           |
|----|-----------|-----------|-----------|
| N  | -3.133728 | -0.119540 | -0.000181 |
| O  | -1.672132 | 0.263341  | 0.000080  |
| H  | -2.646174 | 0.980546  | -0.005417 |
| H  | -3.332197 | -0.635870 | 0.856795  |
| H  | -3.329554 | -0.645333 | -0.851999 |
| Ba | 0.796805  | -0.017309 | 0.000022  |



a-5-Ba

|    |           |           |           |
|----|-----------|-----------|-----------|
| N  | 3.019983  | -0.289737 | -0.000005 |
| O  | 1.786168  | 0.496684  | 0.000002  |
| H  | 2.127682  | 1.409406  | -0.000023 |
| H  | 2.938743  | -0.884838 | -0.825631 |
| H  | 2.938791  | -0.884778 | 0.825669  |
| Ba | -0.775615 | -0.028305 | 0.000000  |

BaOH<sup>+</sup>

|    |          |          |           |
|----|----------|----------|-----------|
| Ba | 0.000000 | 0.000000 | 0.310486  |
| O  | 0.000000 | 0.000000 | -1.824323 |
| H  | 0.000000 | 0.000000 | -2.792612 |

BaNH<sup>+</sup>

|    |          |          |           |
|----|----------|----------|-----------|
| Ba | 0.000000 | 0.000000 | 0.301130  |
| N  | 0.000000 | 0.000000 | -1.979802 |
| H  | 0.000000 | 0.000000 | -3.004668 |
